# Supplementary material
Source: PubMed Central journal article supplement (PMC2742853)
Supplement: supp_M807648200_Supplementary_Materials_090312.pdf [file supp_M807648200_Supplementary_Materials_090312.pdf]

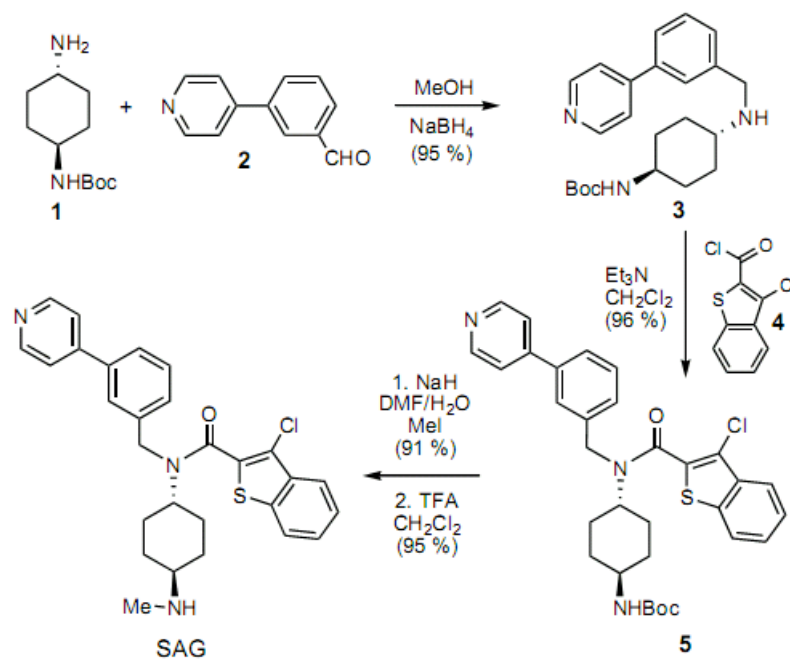

**Fig S1.** Concise synthesis of SAG. **1** and **2** were mixed in methanol at room temperature for half an hour without adding any molecular sieves; the resultant imine was then reduced by NaBH<sub>4</sub> to give product **3** through a direct reductive amination. Then **3** was treated with acyl chloride **4** in CH<sub>2</sub>Cl<sub>2</sub> with triethyl amine as the base to afford desired product **5**. The methylated product was eventually obtained by treatment of substrate **5** with NaH in the presence of catalytic amount of water in DMF at 0 °C for 1 h, followed by reaction with methyl iodide at room temperature for 5h. Thus, our final target **SAG** was generated by treatment of the methylated product with TFA in CH<sub>2</sub>Cl<sub>2</sub>.

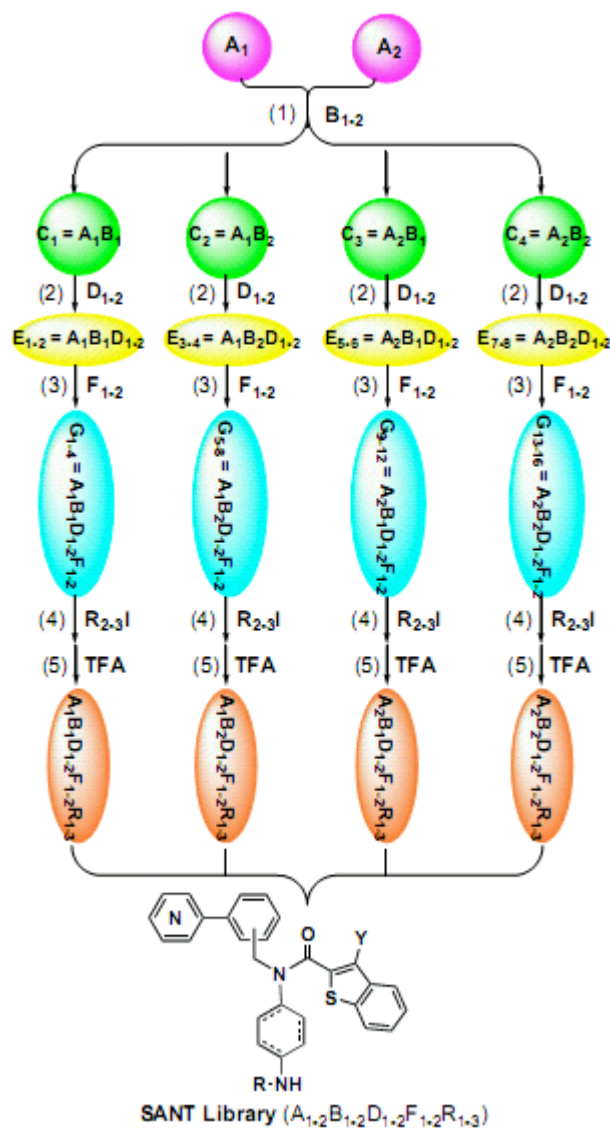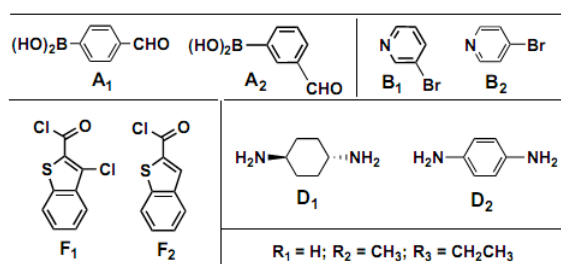

Reagents and reaction conditions: (1)  $Pd(PPh_3)_4$ ,  $Na_2CO_3$ , Toluene/ $H_2O$ , 85 °C; (2)  $NaBH_4$ ,  $CH_3OH$ ; (3)  $Et_3N$ ,  $CH_2Cl_2$ ; (4)  $NaH$ ,  $DMF/H_2O$ ; then RI (if  $R = H$ , this step could be omitted); (5)  $TFA$ ,  $CH_2Cl_2$ .

**Fig S2.** Parallel synthesis of initial SANT library. The scaffold of SAG could be constructed by combining together five distinct modules ( $A_{1-2}$ ,  $B_{1-2}$ ,  $D_{1-2}$ ,  $F_{1-2}$ ,  $R_{1-3}$ ). Following the synthesis of SAG, the design elements for SANT library included replacing the cyclohexane-1,4-diamine with benzene-1,4-diamine, changing the substitution pattern of the biaryl fragment, varying the isosteric substituents on the benzo[*b*]thiophene ring, and replacing the methyl group by other alkyl groups. (if  $R = H$ , step (4) could be omitted)

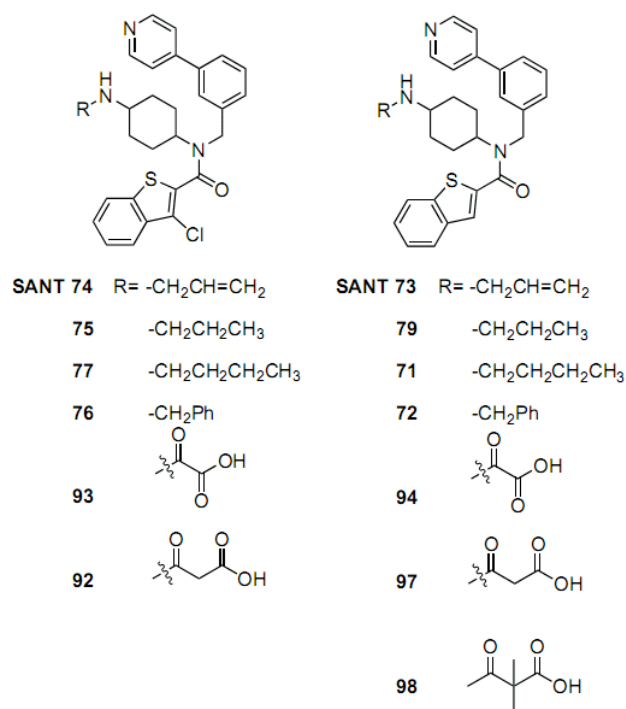

**Fig S3.** Structures of the 13 compounds in the focused library.

Table S1. The lowest effective concentrations of compounds in the focused library on Flk:GFP embryos(3 independent assay)

| Compound | Lowest effective concentration (μM) | Compound | Lowest effective concentration (μM) |
|----------|-------------------------------------|----------|-------------------------------------|
| SANT 19  | 80                                  |          |                                     |
| SANT 74  | 5                                   | SANT 73  | >100                                |
| SANT 75  | 5                                   | SANT 79  | 40                                  |
| SANT 77  | 30                                  | SANT 71  | 30                                  |
| SANT 76  | >100                                | SANT 72  | >100                                |
| SANT 93  | 80                                  | SANT 94  | >100                                |
| SANT 92  | 40                                  | SANT 97  | >100                                |
|          |                                     | SANT 98  | 40                                  |

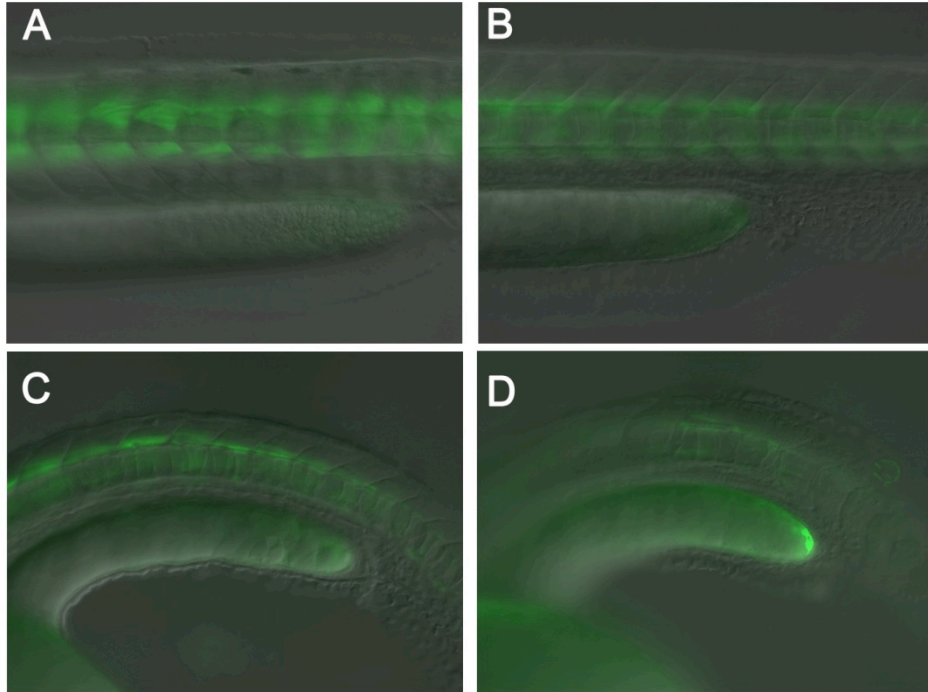

Fig S4 Ablation of Gli:GFP by different concentration of SANT75.

- A. Gli:GFP expression treated with DMSO in 2dpf embryos. B C and D. Ablation of Gli:GFP by 5, 10, 15 $\mu$ M SANT75 in 2dpf embryos .

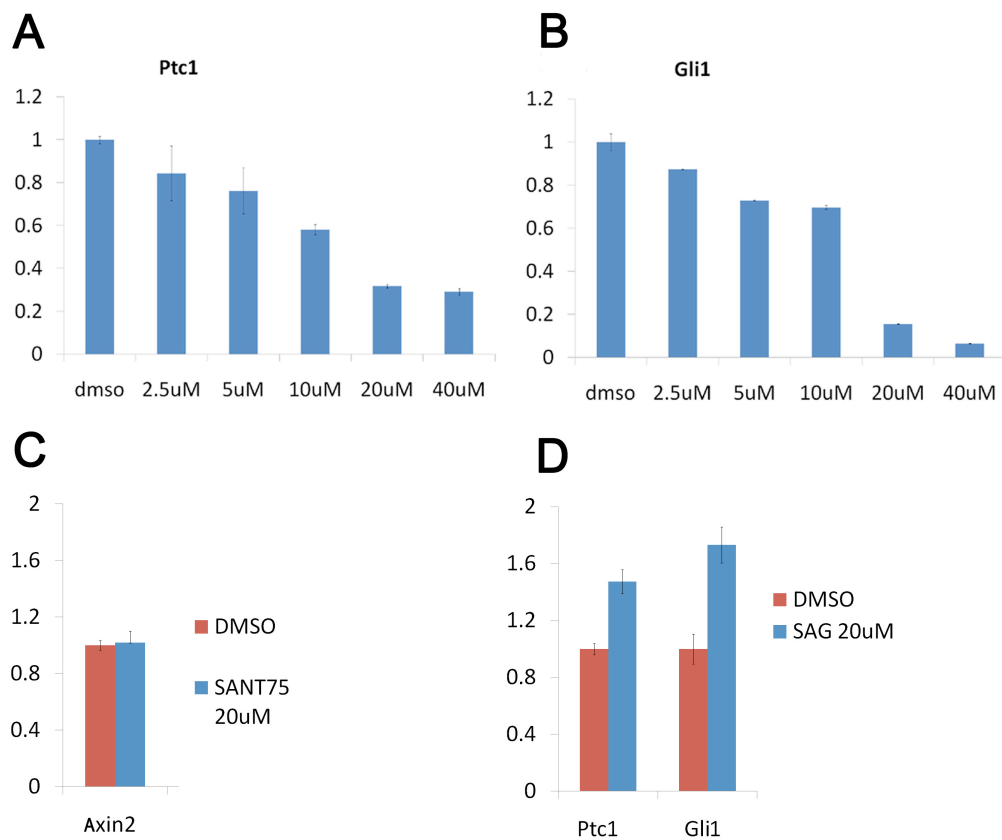

Fig S5. The expression level of Gli1 and Ptc1 of embryos treated with SANT74 and SAG. A and B Reverse transcription followed by real-time PCR shows the dose-dependent down-regulation of Hh signal pathway target genes mRNA levels after treatment with different concentration of SANT74. A and B show Ptc1/beta-actin and Gli1/beta-actin mRNA ratio, respectively. C shows no changes of Axin2 expression between embryos treated with 20  $\mu$ M SANT74 and DMSO. D shows higher level of Ptc1 and Gli1 expression between embryos treated with 20  $\mu$ M SAG and DMSO. The error bars indicate the standard deviation determined from three independent measurements.

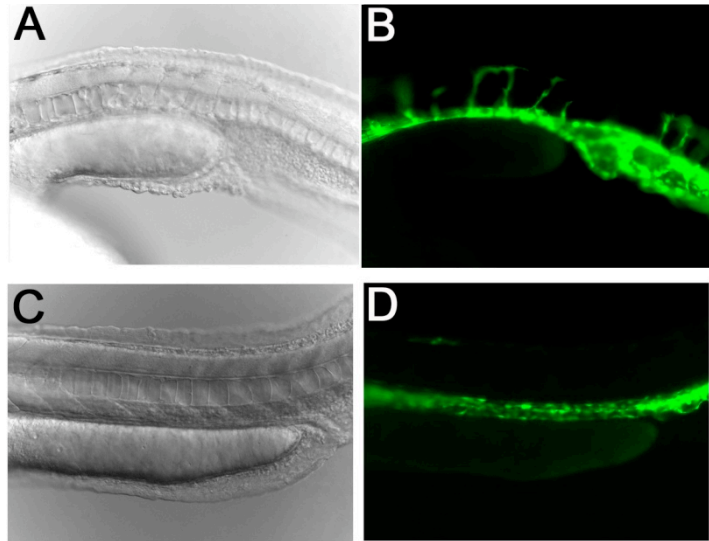

Fig S6 A and B. embryos treated with 40 $\mu$ M SANT74 at 1 hpf but washed out at 17 hpf, A shows the U-shaped somite of treated embryos. B shows the sprouting of ISV of treated embryos. C and D. Embryos treated with 40 $\mu$ M SANT74 at 17 hpf and washed away at 24hpf C shows the normal somite of treated embryos at 36hpf. D shows no ISVs sprouting of treated embryos at 36hpf.

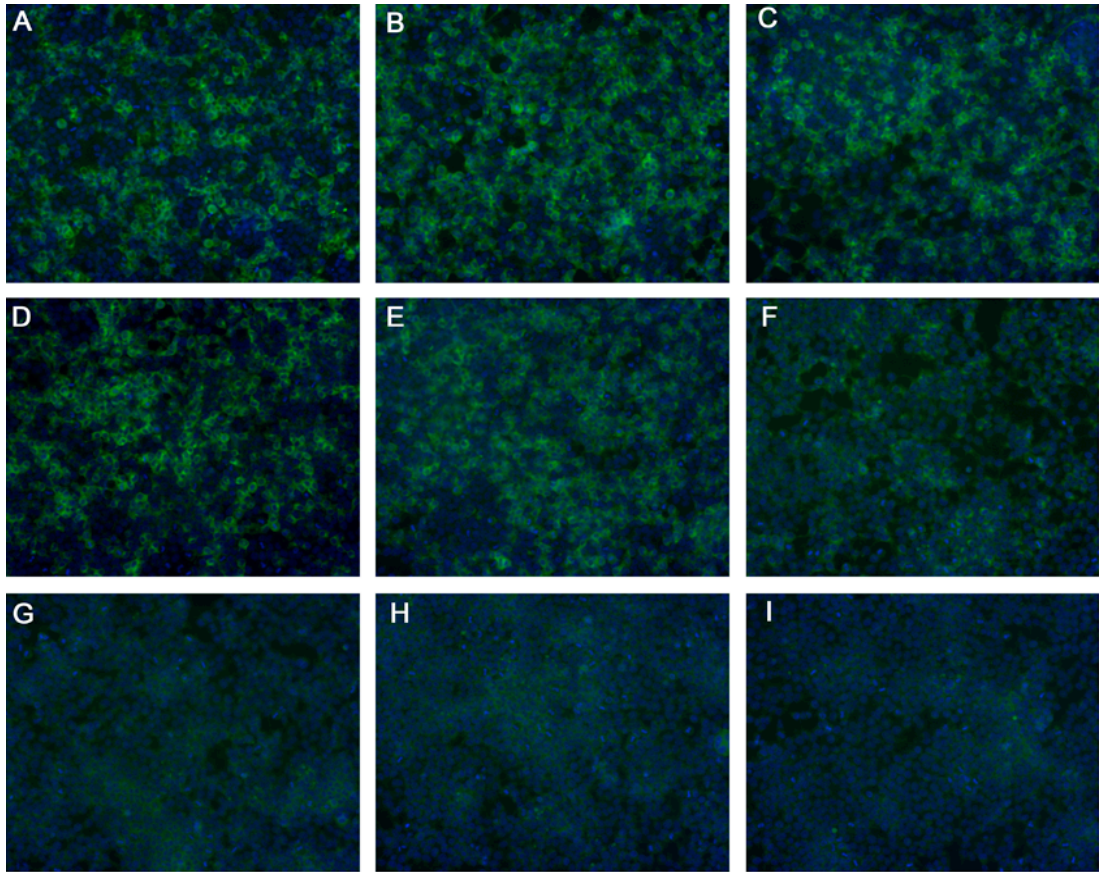

Fig S7 SANT75 competitively blocks the binding of BODIPY-cyclopamine to Smo.

A. Smo-overexpressing HEK 293T cells were incubated with 5 nM BODIPY-cyclopamine (green) and DMSO and counterstained with Hoescht 33342 (blue). B to I. Smo-overexpressing HEK 293T cells were incubated with 5 nM BODIPY-cyclopamine (green) and the indicated with different concentrations of SANT75 (2.5nM 5nM 12.5nM 25nM 50nM 125nM 250nM and 500nM are shown here).

## Synthetic Methods:

### Part I: Synthetic Methods for SAG

1. Preparation of (4-Amino-cyclohexyl)-carbamic Acid tert-Butyl Ester (1 in Fig S1). A solution of Boc<sub>2</sub>O (1.0 g, 4.6 mmol) in methanol (25 mL) was slowly added to trans-1,4-diaminocyclohexane (1.0 g, 8.8 mmol) in methanol (100 mL), and the reaction mixture was stirred at room temperature for 1 h. After filtration, the filtrate was concentrated under vacuum to ~5 mL, and then cooled to -20 °C. The crystallized product was collected. The filtrate was resubmitted to the same reaction condition. After the second cycle, the desired product 1 was obtained in 56% yield (1.05 g). IR (cm<sup>-1</sup>): 3365, 2933, 1686, 1520. <sup>1</sup>H NMR (300 MHz, CDCl<sub>3</sub>): δ 4.90-5.02 (br, 1H), 3.30-3.42 (br, 1H), 2.58-2.66 (m, 1H), 1.92-2.00 (br, 2H), 1.85-1.97 (m, 4H), 1.43 (s, 9H), 1.10-1.25 (m, 4H). <sup>13</sup>C NMR (75 MHz, CDCl<sub>3</sub>): δ 154.0, 77.9, 48.7, 48.0, 34.2, 34.1, 31.0, 30.9, 27.3. MS (EI) calcd for C<sub>11</sub>H<sub>22</sub>N<sub>2</sub>O<sub>2</sub> (M<sup>+</sup>) 214; found 214.

2. Preparation of 3-Pyridin-4-yl-benzaldehyde (2 in Fig S1). To a solution of 4-bromopyridine hydrochloride (533.4 mg, 2.7 mmol) in water (4.0 mL) and toluene (4.8 mL) was added slowly a solution of Na<sub>2</sub>CO<sub>3</sub> (714 mg, 6.7 mmol) in water (7.0 mL) at room temperature. The solution was then mixed with 3-formylbenzeneboronic acid (431 mg, 2.9 mmol), Pd(PPh<sub>3</sub>)<sub>4</sub> (100 mg, 0.086 mmol). The reaction mixture was stirred at 85 °C for 24 h, and then cooled to room temperature. The reaction was worked up by extraction of the mixture with CH<sub>2</sub>Cl<sub>2</sub> (4 × 5 mL). The combined organic phase was dried over anhydrous Na<sub>2</sub>SO<sub>4</sub>. The solvent was removed under vacuum, and the residue was purified by a flash chromatography (silica gel, petroleum ether/EtOAc = 1/4) to give product 2 (420 mg) in 85% yield. <sup>1</sup>H NMR (300 MHz, CDCl<sub>3</sub>): δ 10.1 (s, 1H), 8.72-8.74 (m, 2H), 8.17 (s, 1H), 7.90-7.99 (m, 2H), 7.69 (t, J = 11.4 Hz, 1H), 7.57 (d, J = 6.6 Hz, 2H). <sup>13</sup>C NMR (75 MHz, CDCl<sub>3</sub>): δ 191.5, 150.3, 146.5, 138.8, 136.8, 132.5, 130.1, 129.6, 127.5, 121.3. HRMS (ESI) calcd for C<sub>12</sub>H<sub>9</sub>NO (M+H<sup>+</sup>) 184.07569; found 184.07538.

3. Preparation of [4-(3-Pyridine-4-yl-benzylamino)-cyclo-hexyl]-carbamic Acid tert-Butyl Ester (3 in Fig S1). To a solution of 3-pyridinyl benzaldehyde (2) (205 mg, 1.1 mmol) in methanol (20 mL) was added N-Boc-1,4-diaminocyclohexane (1) (300 mg, 1.4 mmol), and the mixture was stirred at room temperature for 30 min. To this solution was added NaBH<sub>4</sub> (0.5 g, 13.2 mmol) in portions at 0 °C, and the reaction mixture was stirred at room temperature overnight. The reaction was worked up by addition of saturated aqueous Na<sub>2</sub>CO<sub>3</sub> (2 mL), and the mixture was then extracted with chloroform (3 × 6 mL). The combined organic layers were dried over anhydrous MgSO<sub>4</sub>. The solvent was removed under vacuum, and the residue was purified by a flash chromatography on silica gel (CH<sub>2</sub>Cl<sub>2</sub>/MeOH = 10/1) to give 3 (398 mg) in 95% yield. <sup>1</sup>H NMR (300 MHz, CDCl<sub>3</sub>): δ 8.66 (d, J = 8.1 Hz, 2H), 7.39-7.61 (m, 6H), 4.30-4.50 (br, 1H), 3.88 (s, 2H), 3.30-3.50 (br, 1H), 2.40-2.60 (m, 1H), 1.90-2.10 (m, 4H), 1.70-1.90 (br, 1H), 1.44 (s, 9H), 1.06-1.40 (m, 4H). <sup>13</sup>C NMR (75 MHz, CDCl<sub>3</sub>): δ 155.2, 150.0, 148.3, 141.5, 138.1, 129.1, 128.7, 126.6, 125.5, 121.6, 79.0, 55.6, 51.0, 49.4, 31.9, 28.3. HRMS (ESI) calcd for C<sub>23</sub>H<sub>31</sub>N<sub>3</sub>O<sub>2</sub> (M + H<sup>+</sup>) 382.24890; found 382.24896.

4. Preparation of {4-[(3-Chloro-benzo[b]thiophene-2-carbonyl)-(3-pyridin-4-yl-benzyl)-amino]-cyclohexyl}-Carbamic Acid tert-Butyl Ester (5 in Fig S1). To a solution of 3 (410 mg, 1.1 mmol) and Et<sub>3</sub>N (280 μL, 2.0 mmol) in CH<sub>2</sub>Cl<sub>2</sub> (10 mL) was added



3-chlorobenzo[b]thiophene-2- carbonyl chloride 4 (278 mg, 1.2 mmol), and the reaction mixture was stirred at room temperature for 0.5 h. The solvent was removed, and the residue was purified by a flash chromatography on silica gel (acetone/PE = 5:1) to give the desired product 19 (587 mg) in 96% yield. <sup>1</sup>H NMR (400 MHz, CDCl<sub>3</sub>): δ 8.65 (br, 2H), 7.20-8.20 (m, 10H), 3.70-5.00 (m, 4H), 3.20-3.40 (br, 1H), 1.75-2.20 (m, 4H), 1.42-1.75 (br, 2H), 1.38 (s, 9H), 0.90-1.30 (br, 2H). <sup>13</sup>C NMR (100 MHz, CDCl<sub>3</sub>): 163.7, 155.1, 150.2, 148.1, 147.7, 139.2, 138.4, 137.2, 135.6, 130.0, 129.3, 127.6, 126.5, 126.2, 125.5, 122.7, 122.5, 121.6, 119.0, 79.2, 58.7, 48.5, 45.1, 32.1, 30.5, 29.7, 29.3, 28.3. HRMS (EI) calcd for C<sub>32</sub>H<sub>34</sub>N<sub>3</sub>O<sub>3</sub>S (M<sup>+</sup>) 575.2009; found 575.2018.

5. Preparation of 3-Chloro-benzo[b]thiophene-2-carboxylic acid (4-Methylamino-cyclohexyl)-(3-pyridin-4-yl-benzyl) amide (SAG). To a solution of compound 5 (61 mg, 0.1 mmol) in DMF (6.0 mL) was added water (2 μL), followed by addition of NaH (~60 mg, 60% suspension in mineral oil), and the reaction mixture was stirred at 0 °C for 1 h. To this solution was added MeI (15 μL), and the resultant mixture was stirred at room temperature for 5 h. The reaction was worked up by addition of saturated solution of NaHCO<sub>3</sub> (10 mL) extracted with Et<sub>2</sub>O (3 × 20 mL). The combined organic layers were dried over Na<sub>2</sub>SO<sub>4</sub>. The solvent was removed under vacuum, and the residue was purified by semipreparative HPLC (94 × 250 XDB C18 column (100% CH<sub>3</sub>CN, 3 mL/min)) to give the methylated product 6 (57 mg) in 91% yield. <sup>1</sup>H NMR (300 MHz, DMSO, T = 333 K): δ 8.63 (d, J = 9.1 Hz, 2H), 8.04-8.22 (m, 1H), 7.84-7.89 (m, 1H), 7.46-7.69 (m, 8H), 4.80 (s, 2H), 3.80-4.18 (br, 1H), 3.60-3.66 (br, 1H), 2.57 (s, 3H), 1.79-1.90 (m, 4H), 1.33-1.55 (m, 2H), 1.33 (s, 9H), 1.26-1.32 (m, 2H). <sup>13</sup>C NMR (75 MHz, CDCl<sub>3</sub>, 323 K): δ 163.6, 155.9, 150.2, 147.8, 139.2, 138.4, 137.2, 135.6, 130.0, 29.3, 127.5, 126.5, 125.4, 122.7, 122.5, 121.6, 118.7, 79.4, 58.7, 52.6, 45.0, 30.8, 29.4, 28.6, 28.3.

To a solution of the methylated product 6 in CH<sub>2</sub>Cl<sub>2</sub> (1.0 mL) was added trifluoroacetic acid (1.0 mL) at 0 °C, and the reaction mixture was stirred at room temperature for 1 h. The reaction was worked up by addition of a saturated solution of Na<sub>2</sub>CO<sub>3</sub> (2 mL) and then extracted with CH<sub>2</sub>Cl<sub>2</sub> (3 × 5 mL), and the combined organic layers were finally dried over anhydrous Na<sub>2</sub>SO<sub>4</sub>. The solvent was removed under vacuum, and the residue was purified by a flash chromatography on silica gel (CH<sub>2</sub>Cl<sub>2</sub>/acetone/TEA = 40/10/1) to give SAG (45 mg) in 95% yield. <sup>1</sup>H NMR (300 MHz, DMSO): δ 8.64 (d, J = 6.0 Hz, 2H), 8.07 (d, J = 7.5 Hz, 1H), 7.85-7.88 (m, 1H), 7.47-7.70 (m, 8H), 4.78 (s, 2H), 3.70-3.90 (br, 1H), 2.20 (s, 3H), 1.85-1.89 (m, 2H), 1.60-1.80 (m, 4H), 0.8-1.0 (m, 2H). <sup>13</sup>C NMR (75 MHz, CDCl<sub>3</sub>): 163.7, 150.3, 148.0, 139.3, 138.5, 137.3, 135.7, 129.3, 127.6, 126.5, 125.8, 125.6, 125.5, 122.7, 122.5, 121.6, 119.0, 59.0, 57.4, 45.8, 3.4, 31.8, 29.8. HRMS (EI) calcd for C<sub>28</sub>H<sub>28</sub>N<sub>3</sub>O<sub>3</sub>S (M<sup>+</sup>) 489.1642; found 489.1651.

## Part II: General Synthetic Methods for SANT Library

1. General Procedure for Preparation of E1~E8 (in Fig S2). To a solution of pyridinyl benzaldehyde (C1~C4) (1.0 mmol) in methanol (15 mL) was added boc-protected D1~D2 (1.1 mmol), and the mixture was stirred at room temperature for 30 min. To this solution was added NaBH<sub>4</sub> (100 mg, 2.5 mmol) in portion at 0 °C, and the mixture was stirred at room temperature for 1 h. The reaction was worked up by addition of a saturated aqueous Na<sub>2</sub>CO<sub>3</sub> (2 mL); the mixture was then extracted with chloroform (3 × 6 mL), and the combined

organic layer was dried over anhydrous Na<sub>2</sub>SO<sub>4</sub>. The solvent was removed under vacuum, and the residue was purified by a flash chromatography on silica gel (CH<sub>2</sub>Cl<sub>2</sub>/MeOH = 10/1) to give compound E1 to E8.

2. General Procedure for Preparation of G1~G16. To a solution of substrate E1~E8 (1.0 mmol) and Et<sub>3</sub>N (280 μL, 2.0 mmol) in CH<sub>2</sub>Cl<sub>2</sub> (10 mL) were added the corresponding acyl chlorides F1~F2 (1.1 mmol, prepared by reaction of the individual acid with SOCl<sub>2</sub>), and the mixture was stirred at room temperature for 0.5 h. The reaction was worked up by removal of solvent, and the residue was purified by a flash chromatography on silica gel (acetone/PE = 5/1) to give the products G1~G16.

3. General Procedure for Preparation of SANT Library. To a solution of compound G1~G16 (0.1 mmol) in DMF (6.0 mL) was added water (2 μL), followed by addition of NaH (~60 mg, 60% suspension in mineral oil), and the mixture was stirred at 0 °C for 1 h. To this solution was added organohalides at 0 °C, and the mixture was stirred at room temperature for 5 h. The reaction was worked up by addition of a saturated solution of NaHCO<sub>3</sub> (10 mL); the mixture was first extracted with Et<sub>2</sub>O (3 × 20 mL), and the combined extract was then dried over anhydrous Na<sub>2</sub>SO<sub>4</sub>. The solvent was removed under vacuum, and the residue was purified by semipreparative HPLC (96 × 250 XDB C18 column (100% CH<sub>3</sub>CN, 3 mL/min)) to give the alkylated product, which was dissolved in CH<sub>2</sub>Cl<sub>2</sub> (1.0 mL). Trifluoroacetic acid (1.0 mL) was added at 0 °C, and the mixture was stirred at room temperature for 4 h. The reaction was worked up by addition of a saturated solution of Na<sub>2</sub>CO<sub>3</sub> (2 mL); the mixture was extracted with CH<sub>2</sub>Cl<sub>2</sub> (3 × 5 mL), and the combined organic layers were dried over anhydrous Na<sub>2</sub>SO<sub>4</sub>. The solvent was removed under vacuum, and the residue was purified by a flash chromatography on silica gel (CH<sub>2</sub>Cl<sub>2</sub>/acetone/TEA = 40/10/1) to give compounds of SANT library.
